# Supplementary material for: Concentration-Dependent Feeding Deterrence to 20-Hydroxyecdysone for Three Subterranean Termite Species (Blattodea: Rhinotermitidae)
Source: Insects. 2021 Mar 4;12(3):218. doi: 10.3390/insects12030218 (PMC8000253; doi:10.3390/insects12030218)
Supplement: Supplementary file 1 [file insects-12-00218-s001.xlsx]

## Sheet: Raw data
Species	Colony	Rep	Treatment	TrtSide	Tpre	Tpost	Tdiff	Cpre	Cpost	Cdiff	CTdiff	Ctsum
C. formosanus	AK1	1	Cont	L	0.4115	0.2988	0.1127	0.441	0.3442	0.0968	-0.0159	0.2095
C. formosanus	AK1	1	E200	L	0.4181	0.3069	0.1112	0.456	0.3418	0.1142	0.003	0.2254
C. formosanus	AK1	1	E500	L	0.4357	0.3881	0.0476	0.4414	0.3617	0.0797	0.0321	0.1273
C. formosanus	AK1	1	E1000	L	0.4051	0.3737	0.0314	0.43	0.329	0.101	0.0696	0.1324
C. formosanus	AK1	1	E2000	L	0.4372	0.4129	0.0243	0.4291	0.3451	0.084	0.0597	0.1083
C. formosanus	AK1	1	N5000	L	0.4373	0.3547	0.0826	0.4381	0.3807	0.0574	-0.0252	0.14
C. formosanus	AK3	2	Cont	R	0.4108	0.311	0.0998	0.4333	0.2972	0.1361	0.0363	0.2359
C. formosanus	JZ	2	Cont	R	0.4184	0.3286	0.0898	0.4093	0.3076	0.1017	0.0119	0.1915
C. formosanus	JZ	2	E200	R	0.4274	0.3637	0.0637	0.4039	0.2887	0.1152	0.0515	0.1789
C. formosanus	JZ	2	E500	R	0.4572	0.3563	0.1009	0.4352	0.3136	0.1216	0.0207	0.2225
C. formosanus	JZ	2	E1000	R	0.4392	0.367	0.0722	0.4065	0.288	0.1185	0.0463	0.1907
C. formosanus	JZ	2	E2000	R	0.4339	0.3853	0.0486	0.418	0.3161	0.1019	0.0533	0.1505
C. formosanus	AK3	2	N5000	R	0.4292	0.335	0.0942	0.4116	0.3056	0.106	0.0118	0.2002
C. formosanus	SG2	3	Cont	L	0.441	0.3762	0.0648	0.43	0.3354	0.0946	0.0298	0.1594
C. formosanus	SG2	3	E200	L	0.4318	0.3915	0.0403	0.435	0.332	0.103	0.0627	0.1433
C. formosanus	SG2	3	E500	L	0.4177	0.3793	0.0384	0.4141	0.3253	0.0888	0.0504	0.1272
C. formosanus	SG2	3	E1000	L	0.4184	0.3741	0.0443	0.4312	0.3538	0.0774	0.0331	0.1217
C. formosanus	SG2	3	E2000	L	0.4704	0.4299	0.0405	0.4454	0.3706	0.0748	0.0343	0.1153
C. formosanus	SG2	3	N5000	L	0.4136	0.3633	0.0503	0.443	0.3715	0.0715	0.0212	0.1218
C. formosanus	SGWH	4	Cont	R	0.4105	0.374	0.0365	0.4265	0.3674	0.0591	0.0226	0.0956
C. formosanus	SGWH	4	E200	R	0.403	0.3657	0.0373	0.4168	0.3591	0.0577	0.0204	0.095
C. formosanus	SGWH	4	E500	R	0.4299	0.3768	0.0531	0.4683	0.4259	0.0424	-0.0107	0.0955
C. formosanus	SGWH	4	E1000	R	0.4296	0.3977	0.0319	0.4045	0.37	0.0345	0.0026	0.0664
C. formosanus	SGWH	4	E2000	R	0.4395	0.4248	0.0147	0.4396	0.3805	0.0591	0.0444	0.0738
C. formosanus	SGWH	4	N5000	R	0.409	0.3797	0.0293	0.3862	0.334	0.0522	0.0229	0.0815
C. gestroi	A24	2	Cont	R	0.4657	0.4161	0.0496	0.4485	0.3874	0.0611	0.0115	0.1107
C. gestroi	A24	2	E200	R	0.4202	0.3596	0.0606	0.431	0.3744	0.0566	-0.004	0.1172
C. gestroi	A24	2	E500	R	0.4287	0.3549	0.0738	0.4105	0.3469	0.0636	-0.0102	0.1374
C. gestroi	A24	2	E1000	R	0.4291	0.4113	0.0178	0.4287	0.3604	0.0683	0.0505	0.0861
C. gestroi	A24	2	E2000	R	0.4187	0.3848	0.0339	0.404	0.3401	0.0639	0.03	0.0978
C. gestroi	A24	2	N5000	R	0.4328	0.3826	0.0502	0.4247	0.369	0.0557	0.0055	0.1059
C. gestroi	AA11	4	Cont	R	0.4248	0.3389	0.0859	0.4345	0.3229	0.1116	0.0257	0.1975
C. gestroi	A68	5	Cont	L	0.41719	0.3669	0.05029	0.41244	0.3752	0.03724	-0.01305	0.08753
C. gestroi	AA11	4	E200	R	0.4173	0.3438	0.0735	0.4205	0.2744	0.1461	0.0726	0.2196
C. gestroi	AA11	4	E500	R	0.4105	0.3496	0.0609	0.4365	0.2344	0.2021	0.1412	0.263
C. gestroi	AA11	4	E1000	R	0.4107	0.3902	0.0205	0.4181	0.3081	0.11	0.0895	0.1305
C. gestroi	AA11	4	E2000	R	0.4067	0.3873	0.0194	0.4049	0.2542	0.1507	0.1313	0.1701
C. gestroi	AA11	4	N5000	R	0.414	0.3246	0.0894	0.4221	0.2605	0.1616	0.0722	0.251
C. gestroi	AA3	6	Cont	L	0.44058	0.4085	0.03208	0.43888	0.4003	0.03858	0.0065	0.07066
C. gestroi	AB2	3	Cont	L	0.4108	0.2365	0.1743	0.4251	0.2712	0.1539	-0.0204	0.3282
C. gestroi	AB2	3	E200	L	0.4121	0.1895	0.2226	0.4375	0.298	0.1395	-0.0831	0.3621
C. gestroi	AB2	3	E500	L	0.4237	0.3411	0.0826	0.4054	0.1734	0.232	0.1494	0.3146
C. gestroi	AB2	3	E1000	L	0.4171	0.3894	0.0277	0.4466	0.2595	0.1871	0.1594	0.2148
C. gestroi	AB2	3	E2000	L	0.4192	0.4057	0.0135	0.4369	0.2532	0.1837	0.1702	0.1972
C. gestroi	AB2	3	N5000	L	0.4388	0.3534	0.0854	0.4423	0.263	0.1793	0.0939	0.2647
C. gestroi	AB9	1	Cont	L	0.4132	0.3528	0.0604	0.4455	0.3915	0.054	-0.0064	0.1144
C. gestroi	AB9	1	E200	L	0.4355	0.3893	0.0462	0.41	0.343	0.067	0.0208	0.1132
C. gestroi	AB9	1	E500	L	0.4335	0.4052	0.0283	0.4152	0.241	0.1742	0.1459	0.2025
C. gestroi	AB9	1	E1000	L	0.4039	0.3817	0.0222	0.4247	0.3351	0.0896	0.0674	0.1118
C. gestroi	AB9	1	E2000	L	0.4358	0.4286	0.0072	0.4481	0.3715	0.0766	0.0694	0.0838
C. gestroi	AB9	1	N5000	L	0.4279	0.3855	0.0424	0.421	0.375	0.046	0.0036	0.0884
R. flavipes	FCUBE	4	Cont	R	0.4186	0.3795	0.0391	0.4095	0.3313	0.0782	0.0391	0.1173
R. flavipes	FCUBE	4	E200	R	0.4274	0.3759	0.0515	0.3988	0.3175	0.0813	0.0298	0.1328
R. flavipes	FCUBE	4	E500	R	0.4448	0.4218	0.023	0.4265	0.3405	0.086	0.063	0.109
R. flavipes	FCUBE	2	E500	R	0.4403	0.3839	0.0564	0.4121	0.3566	0.0555	-0.0009	0.1119
R. flavipes	FCUBE	4	E1000	R	0.383	0.3625	0.0205	0.4325	0.3269	0.1056	0.0851	0.1261
R. flavipes	FCUBE	4	E2000	R	0.4231	0.405	0.0181	0.4304	0.3379	0.0925	0.0744	0.1106
R. flavipes	FCUBE	4	N5000	R	0.4065	0.3544	0.0521	0.4405	0.3731	0.0674	0.0153	0.1195
R. flavipes	FF8	3	Cont	L	0.4171	0.3585	0.0586	0.4111	0.3391	0.072	0.0134	0.1306
R. flavipes	FF24	3	E200	L	0.4077	0.3841	0.0236	0.4143	0.3592	0.0551	0.0315	0.0787
R. flavipes	FF12	3	E500	L	0.4333	0.4251	0.0082	0.4431	0.4131	0.03	0.0218	0.0382
R. flavipes	FF14	5	E1000	R	0.421	0.3929	0.0281	0.4142	0.3434	0.0708	0.0427	0.0989
R. flavipes	FF24	3	E1000	L	0.4502	0.424	0.0262	0.4403	0.405	0.0353	0.0091	0.0615
R. flavipes	FF12	3	E2000	L	0.4593	0.4564	0.0029	0.4417	0.4174	0.0243	0.0214	0.0272
R. flavipes	FF24	3	N5000	L	0.4399	0.4251	0.0148	0.4513	0.4092	0.0421	0.0273	0.0569
R. flavipes	vmb	1	Cont	L	0.4704	0.4422	0.0282	0.428	0.4042	0.0238	-0.0044	0.052
R. flavipes	SW	5	E200	R	0.4615	0.4425	0.019	0.4208	0.3849	0.0359	0.0169	0.0549
R. flavipes	vmb	1	E200	L	0.4197	0.4001	0.0196	0.433	0.4022	0.0308	0.0112	0.0504
R. flavipes	vmb	1	E500	L	0.4435	0.4243	0.0192	0.4308	0.3815	0.0493	0.0301	0.0685
R. flavipes	vmb	1	E1000	L	0.4455	0.4371	0.0084	0.3938	0.3739	0.0199	0.0115	0.0283
R. flavipes	vmb	1	E2000	L	0.4081	0.3946	0.0135	0.4184	0.383	0.0354	0.0219	0.0489
R. flavipes	SW	5	N5000	R	0.4087	0.4044	0.0043	0.4325	0.3932	0.0393	0.035	0.0436
R. flavipes	vp	2	Cont	R	0.4239	0.4	0.0239	0.4347	0.4114	0.0233	-0.0006	0.0472
R. flavipes	vmb	5	Cont	L	0.4359	0.4125	0.0234	0.4215	0.3979	0.0236	0.0002	0.047
R. flavipes	vp	2	E200	R	0.4129	0.3995	0.0134	0.4174	0.3852	0.0322	0.0188	0.0456
R. flavipes	vp	2	E1000	R	0.4379	0.4228	0.0151	0.4399	0.404	0.0359	0.0208	0.051
R. flavipes	vmb	2	E2000	R	0.4224	0.4024	0.02	0.4291	0.4014	0.0277	0.0077	0.0477
R. flavipes	vmb	2	N5000	R	0.4458	0.4412	0.0046	0.4423	0.4042	0.0381	0.0335	0.0427
R. flavipes	vs2	6	N5000	R	0.4212	0.4207	0.0005	0.4319	0.409	0.0229	0.0224	0.0234

## Sheet: Data summary
Species	Colony	Rep	Treatment	TrtSide	Tdiff	Cdiff	Ctsum		Species	Colony	Rep	Treatment	TrtSide	Tdiff	Cdiff	Ctsum					Average_T	SD	SE	Average_C	SD	SE
CF	AK1	1	Cont	L	0.1127	0.0968	0.2095		CF	AK1	1	Cont	L	0.1127	0.0968	0.2095		CF	5	Cont	0.08072	0.0271222	0.0121294	0.09766	0.0244578	0.0109379
CF	AK3	2	Cont	R	0.0998	0.1361	0.2359		CF	AK3	2	Cont	R	0.0998	0.1361	0.2359			4	E200	0.063125	0.0295781	0.014789	0.097525	0.0234865	0.0117433
CF	JZ	2	Cont	R	0.0898	0.1017	0.1915		CF	JZ	2	Cont	R	0.0898	0.1017	0.1915			4	E500	0.06	0.0241906	0.0120953	0.083125	0.0282081	0.014104
CF	SG2	3	Cont	L	0.0648	0.0946	0.1594		CF	SG2	3	Cont	L	0.0648	0.0946	0.1594			4	E1000	0.04495	0.0165597	0.00827983	0.08285	0.0314951	0.0157476
CF	SGWH	4	Cont	R	0.0365	0.0591	0.0956		CF	SGWH	4	Cont	R	0.0365	0.0591	0.0956			4	E2000	0.032025	0.013289	0.00664449	0.07995	0.0154875	0.00774375
CG	A24	2	Cont	R	0.0496	0.0611	0.1107		CF	AK1	1	E200	L	0.1112	0.1142	0.2254			4	N5000	0.0641	0.0257378	0.0128689	0.071775	0.0209836	0.0104918
CG	AA11	4	Cont	R	0.0859	0.1116	0.1975		CF	JZ	2	E200	R	0.0637	0.1152	0.1789
CG	A68	5	Cont	L	0.05029	0.03724	0.08753		CF	SG2	3	E200	L	0.0403	0.103	0.1433		CG	6	Cont	0.0754283	0.0470624	0.0192132	0.07607	0.042709	0.0174359
CG	AA3	6	Cont	L	0.03208	0.03858	0.07066		CF	SGWH	4	E200	R	0.0373	0.0577	0.095			4	E200	0.100725	0.0710241	0.0355121	0.1023	0.0407335	0.0203667
CG	AB2	3	Cont	L	0.1743	0.1539	0.3282		CF	AK1	1	E500	L	0.0476	0.0797	0.1273			4	E500	0.0614	0.0206098	0.0103049	0.167975	0.0636329	0.0318165
CG	AB9	1	Cont	L	0.0604	0.054	0.1144		CF	JZ	2	E500	R	0.1009	0.1216	0.2225			4	E1000	0.02205	0.00361974	0.00180987	0.11375	0.044842	0.022421
RF	FCUBE	4	Cont	R	0.0391	0.0782	0.1173		CF	SG2	3	E500	L	0.0384	0.0888	0.1272			4	E2000	0.0185	0.00988256	0.00494128	0.118725	0.0500611	0.0250305
RF	FF8	3	Cont	L	0.0586	0.072	0.1306		CF	SGWH	4	E500	R	0.0531	0.0424	0.0955			4	N5000	0.06685	0.0207824	0.0103912	0.11065	0.0602243	0.0301121
RF	vmb	1	Cont	L	0.0282	0.0238	0.052		CF	AK1	1	E1000	L	0.0314	0.101	0.1324
RF	vp	2	Cont	R	0.0239	0.0233	0.0472		CF	JZ	2	E1000	R	0.0722	0.1185	0.1907		RF	5	Cont	0.03464	0.0132449	0.00592328	0.04418	0.0253226	0.0113246
RF	vmb	5	Cont	L	0.0234	0.0236	0.047		CF	SG2	3	E1000	L	0.0443	0.0774	0.1217			5	E200	0.02542	0.0134391	0.00601015	0.04706	0.0192186	0.00859482
CF	AK1	1	E200	L	0.1112	0.1142	0.2254		CF	SGWH	4	E1000	R	0.0319	0.0345	0.0664			4	E500	0.0267	0.0179881	0.00899403	0.0552	0.0201158	0.0100579
CF	JZ	2	E200	R	0.0637	0.1152	0.1789		CF	AK1	1	E2000	L	0.0243	0.084	0.1083			5	E1000	0.01966	0.00724282	0.00323909	0.0535	0.0309311	0.0138328
CF	SG2	3	E200	L	0.0403	0.103	0.1433		CF	JZ	2	E2000	R	0.0486	0.1019	0.1505			4	E2000	0.013625	0.00662774	0.00331387	0.044975	0.0277317	0.0138658
CF	SGWH	4	E200	R	0.0373	0.0577	0.095		CF	SG2	3	E2000	L	0.0405	0.0748	0.1153			5	N5000	0.01526	0.0190211	0.0085065	0.04196	0.0143699	0.00642642
CG	A24	2	E200	R	0.0606	0.0566	0.1172		CF	SGWH	4	E2000	R	0.0147	0.0591	0.0738
CG	AA11	4	E200	R	0.0735	0.1461	0.2196		CF	AK1	1	N5000	L	0.0826	0.0574	0.14
CG	AB2	3	E200	L	0.2226	0.1395	0.3621		CF	AK3	2	N5000	R	0.0942	0.106	0.2002
CG	AB9	1	E200	L	0.0462	0.067	0.1132		CF	SG2	3	N5000	L	0.0503	0.0715	0.1218
RF	FCUBE	4	E200	R	0.0515	0.0813	0.1328		CF	SGWH	4	N5000	R	0.0293	0.0522	0.0815
RF	FF24	3	E200	L	0.0236	0.0551	0.0787
RF	SW	5	E200	R	0.019	0.0359	0.0549		CG	A24	2	Cont	R	0.0496	0.0611	0.1107
RF	vmb	1	E200	L	0.0196	0.0308	0.0504		CG	AA11	4	Cont	R	0.0859	0.1116	0.1975
RF	vp	2	E200	R	0.0134	0.0322	0.0456		CG	A68	5	Cont	L	0.05029	0.03724	0.08753
CF	AK1	1	E500	L	0.0476	0.0797	0.1273		CG	AA3	6	Cont	L	0.03208	0.03858	0.07066
CF	JZ	2	E500	R	0.1009	0.1216	0.2225		CG	AB2	3	Cont	L	0.1743	0.1539	0.3282
CF	SG2	3	E500	L	0.0384	0.0888	0.1272		CG	AB9	1	Cont	L	0.0604	0.054	0.1144
CF	SGWH	4	E500	R	0.0531	0.0424	0.0955		CG	A24	2	E200	R	0.0606	0.0566	0.1172
CG	A24	2	E500	R	0.0738	0.0636	0.1374		CG	AA11	4	E200	R	0.0735	0.1461	0.2196
CG	AA11	4	E500	R	0.0609	0.2021	0.263		CG	AB2	3	E200	L	0.2226	0.1395	0.3621
CG	AB2	3	E500	L	0.0826	0.232	0.3146		CG	AB9	1	E200	L	0.0462	0.067	0.1132
CG	AB9	1	E500	L	0.0283	0.1742	0.2025		CG	A24	2	E500	R	0.0738	0.0636	0.1374
RF	FCUBE	4	E500	R	0.023	0.086	0.109		CG	AA11	4	E500	R	0.0609	0.2021	0.263
RF	FCUBE	2	E500	R	0.0564	0.0555	0.1119		CG	AB2	3	E500	L	0.0826	0.232	0.3146
RF	FF12	3	E500	L	0.0082	0.03	0.0382		CG	AB9	1	E500	L	0.0283	0.1742	0.2025
RF	vmb	1	E500	L	0.0192	0.0493	0.0685		CG	A24	2	E1000	R	0.0178	0.0683	0.0861
CF	AK1	1	E1000	L	0.0314	0.101	0.1324		CG	AA11	4	E1000	R	0.0205	0.11	0.1305
CF	JZ	2	E1000	R	0.0722	0.1185	0.1907		CG	AB2	3	E1000	L	0.0277	0.1871	0.2148
CF	SG2	3	E1000	L	0.0443	0.0774	0.1217		CG	AB9	1	E1000	L	0.0222	0.0896	0.1118
CF	SGWH	4	E1000	R	0.0319	0.0345	0.0664		CG	A24	2	E2000	R	0.0339	0.0639	0.0978
CG	A24	2	E1000	R	0.0178	0.0683	0.0861		CG	AA11	4	E2000	R	0.0194	0.1507	0.1701
CG	AA11	4	E1000	R	0.0205	0.11	0.1305		CG	AB2	3	E2000	L	0.0135	0.1837	0.1972
CG	AB2	3	E1000	L	0.0277	0.1871	0.2148		CG	AB9	1	E2000	L	0.0072	0.0766	0.0838
CG	AB9	1	E1000	L	0.0222	0.0896	0.1118		CG	A24	2	N5000	R	0.0502	0.0557	0.1059
RF	FCUBE	4	E1000	R	0.0205	0.1056	0.1261		CG	AA11	4	N5000	R	0.0894	0.1616	0.251
RF	FF14	5	E1000	R	0.0281	0.0708	0.0989		CG	AB2	3	N5000	L	0.0854	0.1793	0.2647
RF	FF24	3	E1000	L	0.0262	0.0353	0.0615		CG	AB9	1	N5000	L	0.0424	0.046	0.0884
RF	vmb	1	E1000	L	0.0084	0.0199	0.0283
RF	vp	2	E1000	R	0.0151	0.0359	0.051		RF	FCUBE	4	Cont	R	0.0391	0.0782	0.1173
CF	AK1	1	E2000	L	0.0243	0.084	0.1083		RF	FF8	3	Cont	L	0.0586	0.072	0.1306
CF	JZ	2	E2000	R	0.0486	0.1019	0.1505		RF	vmb	1	Cont	L	0.0282	0.0238	0.052
CF	SG2	3	E2000	L	0.0405	0.0748	0.1153		RF	vp	2	Cont	R	0.0239	0.0233	0.0472
CF	SGWH	4	E2000	R	0.0147	0.0591	0.0738		RF	vmb	5	Cont	L	0.0234	0.0236	0.047
CG	A24	2	E2000	R	0.0339	0.0639	0.0978		RF	FCUBE	4	E200	R	0.0515	0.0813	0.1328
CG	AA11	4	E2000	R	0.0194	0.1507	0.1701		RF	FF24	3	E200	L	0.0236	0.0551	0.0787
CG	AB2	3	E2000	L	0.0135	0.1837	0.1972		RF	SW	5	E200	R	0.019	0.0359	0.0549
CG	AB9	1	E2000	L	0.0072	0.0766	0.0838		RF	vmb	1	E200	L	0.0196	0.0308	0.0504
RF	FCUBE	4	E2000	R	0.0181	0.0925	0.1106		RF	vp	2	E200	R	0.0134	0.0322	0.0456
RF	FF12	3	E2000	L	0.0029	0.0243	0.0272		RF	FCUBE	4	E500	R	0.023	0.086	0.109
RF	vmb	1	E2000	L	0.0135	0.0354	0.0489		RF	FCUBE	2	E500	R	0.0564	0.0555	0.1119
RF	vmb	2	E2000	R	0.02	0.0277	0.0477		RF	FF12	3	E500	L	0.0082	0.03	0.0382
CF	AK1	1	N5000	L	0.0826	0.0574	0.14		RF	vmb	1	E500	L	0.0192	0.0493	0.0685
CF	AK3	2	N5000	R	0.0942	0.106	0.2002		RF	FCUBE	4	E1000	R	0.0205	0.1056	0.1261
CF	SG2	3	N5000	L	0.0503	0.0715	0.1218		RF	FF14	5	E1000	R	0.0281	0.0708	0.0989
CF	SGWH	4	N5000	R	0.0293	0.0522	0.0815		RF	FF24	3	E1000	L	0.0262	0.0353	0.0615
CG	A24	2	N5000	R	0.0502	0.0557	0.1059		RF	vmb	1	E1000	L	0.0084	0.0199	0.0283
CG	AA11	4	N5000	R	0.0894	0.1616	0.251		RF	vp	2	E1000	R	0.0151	0.0359	0.051
CG	AB2	3	N5000	L	0.0854	0.1793	0.2647		RF	FCUBE	4	E2000	R	0.0181	0.0925	0.1106
CG	AB9	1	N5000	L	0.0424	0.046	0.0884		RF	FF12	3	E2000	L	0.0029	0.0243	0.0272
RF	FCUBE	4	N5000	R	0.0521	0.0674	0.1195		RF	vmb	1	E2000	L	0.0135	0.0354	0.0489
RF	FF24	3	N5000	L	0.0148	0.0421	0.0569		RF	vmb	2	E2000	R	0.02	0.0277	0.0477
RF	SW	5	N5000	R	0.0043	0.0393	0.0436		RF	FCUBE	4	N5000	R	0.0521	0.0674	0.1195
RF	vmb	2	N5000	R	0.0046	0.0381	0.0427		RF	FF24	3	N5000	L	0.0148	0.0421	0.0569
RF	vs2	6	N5000	R	0.0005	0.0229	0.0234		RF	SW	5	N5000	R	0.0043	0.0393	0.0436
									RF	vmb	2	N5000	R	0.0046	0.0381	0.0427
									RF	vs2	6	N5000	R	0.0005	0.0229	0.0234
